# Supplementary material
Source: HighWire-hosted journal article supplement (https://www.cmaj.ca/highwire/filestream/80676/field_highwire_adjunct_files/0/202901-res-1-at.pdf)
Supplement: 202901-res-1-at.pdf [file 202901-res-1-at.pdf]

## **Appendix 1: Derivation and Validation of Multicenter Predictive Indices for Cardiac Readmission after Major Cardiac Surgery**

Louise Y. Sun, MD SM et al

### **SUPPLEMENTAL MATERIAL**

Supplemental Table 1. Survey variables

Supplemental Table 2. Model candidate variables, data sources and formats

Supplemental Table 3. Baseline characteristics of CABG derivation and validation cohorts

Supplemental Table 4. Baseline characteristics of AVR derivation and validation cohorts

Supplemental Table 5. Baseline characteristics of CABG+AVR derivation and validation cohorts

Supplemental Figure 1. Calibration plots for observed versus expected 30-day mortality rates by decile of expected rate and surgery type

**Supplemental Table 1.** Candidate variables in survey

| <b>Demographics</b>                                                                                                                                                    |
|------------------------------------------------------------------------------------------------------------------------------------------------------------------------|
| Age                                                                                                                                                                    |
| Sex                                                                                                                                                                    |
| Race/ethnicity                                                                                                                                                         |
| <b>Risk Factors</b>                                                                                                                                                    |
| Body surface area (BSA)                                                                                                                                                |
| Height/weight/body mass index (BMI)                                                                                                                                    |
| Recent smoker/timing                                                                                                                                                   |
| Alcohol consumption                                                                                                                                                    |
| Illicit drug use                                                                                                                                                       |
| Family history of coronary artery disease                                                                                                                              |
| Endocarditis                                                                                                                                                           |
| Prior stroke                                                                                                                                                           |
| Prior transient ischemic attack (TIA)                                                                                                                                  |
| Carotid stenosis                                                                                                                                                       |
| Cerebrovascular disease (stroke/TIA/ $\geq 50\%$ stenosis of major extra- or intracranial vessels to the brain/previous cervical or cerebral artery revascularization) |
| Previous carotid surgery                                                                                                                                               |
| Diabetes                                                                                                                                                               |
| Diabetes control method                                                                                                                                                |
| Renal failure/dialysis/ type of control                                                                                                                                |
| Hypertension                                                                                                                                                           |
| Peripheral arterial/vascular disease (PAD/PVD)                                                                                                                         |
| Home oxygen                                                                                                                                                            |
| Cancer diagnosis within 5 years                                                                                                                                        |
| Chronic lung disease                                                                                                                                                   |
| Recent pneumonia                                                                                                                                                       |
| Liver disease                                                                                                                                                          |
| Sleep apnea                                                                                                                                                            |
| Unresponsive neurologic status within 24 hours                                                                                                                         |
| Syncope                                                                                                                                                                |
| Immunosuppressive therapy/timing                                                                                                                                       |
| Organ transplant history                                                                                                                                               |
| Neurological/musculoskeletal dysfunction severely affecting mobility                                                                                                   |
| <b>Lab Measures</b>                                                                                                                                                    |
| Creatinine                                                                                                                                                             |
| Hematocrit                                                                                                                                                             |
| White blood cells                                                                                                                                                      |
| Platelets                                                                                                                                                              |
| Total albumin                                                                                                                                                          |
| Bilirubin                                                                                                                                                              |
| <b>Previous Cardiac Interventions</b>                                                                                                                                  |

Appendix 1, as supplied by the authors. Appendix to: Sun LY, Chu A, Tam DY, et al. Derivation and validation of predictive indices for 30-day mortality after coronary and valvular surgery in Ontario, Canada. *CMAJ* 2021. doi: 10.1503/cmaj.202901. Copyright © 2021 The Author(s) or their employer(s). To receive this resource in an accessible format, please contact us at [cmajgroup@cmaj.ca](mailto:cmajgroup@cmaj.ca).

Previous coronary artery bypass  
 Previous percutaneous coronary intervention/timing  
 Previous aortic valve procedure  
 Previous mitral valve procedure  
 Previous transcatheter valve replacement/percutaneous valve repair  
 Previous other valve procedure  
 Other open cardiac/thoracic aorta operation  
 Number of previous cardiovascular surgeries  
 Previous implantable cardioverter defibrillator  
 Previous any other cardiac intervention

**Preop Cardiac Status/Interventions**

Status (e.g., elective, urgent, emergent, salvage)  
 Critical preoperative state/hemodynamic state  
 Cardiac presentation on admission (no symptoms, stable angina, unstable angina, NSTEMI, STEMI)  
 Angina class (Canadian Cardiovascular Society grading)  
 Immediate operation after catheter procedure  
 Arrhythmia (atrial fibrillation or flutter, 2nd or 3rd degree heart block, sick sinus syndrome, ventricular tachycardia/fibrillation, remote arrhythmias)  
 Myocardial infarction history/timing  
 Mediastinal radiation  
 Preoperative intra-aortic balloon pump (IABP)  
 Heart failure (NYHA class and timing)  
 Cardiogenic shock/timing  
 Extracorporeal membrane oxygenation (ECMO)  
 Catheter-based assist device (CBA)  
 Resuscitation within 24 hours  
 Pulmonary artery systolic pressure

**Cardiac Physiology/Valve Disease**

Left ventricular ejection fraction (LVEF)  
 Number of diseased coronary vessels  
 Left main disease  
 Proximal LAD  
 Aortic root abscess (if AVR/AVR+CABG)  
 Aortic stenosis or aortic insufficiency  
 Aortic insufficiency  
 Mitral stenosis or insufficiency  
 Mitral insufficiency  
 Tricuspid insufficiency  
 Thoracic aorta disease

**Preop Medications**

ADP inhibitor usage/timing of discontinuation  
 Steroids within in 24 hours

Glycoprotein IIb/IIIa inhibitor within 24 hours  
Inotropes within 48 hours  
ACEi/ARB within 24/48 hours (if urgent/emergent/salvage operation)  
P2Y12 platelet inhibitors (e.g., Clopidogrel)  
Warfarin/direct oral anti-coagulants

ACEi indicates angiotensin-converting enzyme inhibitor; ADP, adenosine diphosphate; ARB, angiotensin II receptor blocker; AVR, aortic valve replacement; CABG, coronary artery bypass graft; LAD, left anterior descending artery; NYHA, New York Heart Association; STEMI, ST-elevation myocardial infarction.

**Supplemental Table 2.** Model candidate variables, data sources, coding/validation and formats\*

| <b>Variable</b><br>(reference for code/definition/validation is provided where available) | <b>Data source</b>                | <b>Administrative codes/definition and validation (where available)</b>                                                                                                                                                                                                     | <b>Format</b>                                                    |
|-------------------------------------------------------------------------------------------|-----------------------------------|-----------------------------------------------------------------------------------------------------------------------------------------------------------------------------------------------------------------------------------------------------------------------------|------------------------------------------------------------------|
| Age on surgery date                                                                       | RPDB                              | NA                                                                                                                                                                                                                                                                          | Continuous                                                       |
| Sex                                                                                       | RPDB                              | NA                                                                                                                                                                                                                                                                          | Categorical: (i) Male, (ii) Female                               |
| Ethnicity <sup>1</sup>                                                                    | Ontario Visible Minority Database | Specificity 99.7% for Chinese and South Asian.<br><br>PPV 89.3% for South Asians and 91.9% for Chinese.<br><br>Sensitivity 50.4% for South Asians and 80.2% for Chinese.                                                                                                    | Categorical: (i) Chinese, (ii) South Asian, (iii) Other/unknown, |
| Prior stroke or transient ischemic attack <sup>2</sup>                                    | CIHI DAD, NACRS                   | ICD-9: 430, 431, 434, 435, 436, 362.3 (Kappa = 0.86 (95% CI 0.81-0.91))<br><br>ICD-10-CA: I60, I61, I63 (excluding I63.6), I64, G45.0, G45.1, G45.2, G45.3, G45.8, G45.9, H34.0, H34.1 (Kappa = 0.89 (95% CI 0.82-0.96))                                                    | Binary                                                           |
| Carotid endarterectomy/stenting <sup>3</sup>                                              | CIHI DAD, OHIP                    | CCP: 5012<br><br>CCI: 1JE57L (PPV = 99.0% (95% CI 94.6-100); sensitivity 89.6% (95% CI, 86.7-92.1)) or 1JE50 (PPV = 87.0% (95% CI 78.8-92.9); sensitivity 92.9% (95% CI, 87.4-96.1))<br><br>OHIP fee codes: N220 (PPV = 99.0% (95% CI 94.6-100)) or R792 (PPV = 100 (95% CI | Binary                                                           |

|                                                                          |                           |                                                                                                                                                                                                                                                                                                                                                                                                                                                                    |                                                                                              |
|--------------------------------------------------------------------------|---------------------------|--------------------------------------------------------------------------------------------------------------------------------------------------------------------------------------------------------------------------------------------------------------------------------------------------------------------------------------------------------------------------------------------------------------------------------------------------------------------|----------------------------------------------------------------------------------------------|
|                                                                          |                           | 96.4-100)) (sensitivity for both 81.5% (95% CI, 77.9-84.7))                                                                                                                                                                                                                                                                                                                                                                                                        |                                                                                              |
| Chronic lung disease                                                     | CorHealth Registry        | History of obstructive or restrictive lung disease and on pharmacological therapy                                                                                                                                                                                                                                                                                                                                                                                  | Binary                                                                                       |
| History of dialysis                                                      | CorHealth Registry        | History of dialysis in any form at time of referral                                                                                                                                                                                                                                                                                                                                                                                                                | Binary                                                                                       |
| Liver disease <sup>4</sup>                                               | DAD                       | <p>ICD-9: 571, 456.0-456.2, 572.2-572.8, 070.2-070.9, 570, 573.3-573.9, V42.7</p> <p>ICD-10-CA: B18, K70.0-K70.3, K70.9, K71.3-K71.5, K71.7, K73, K74, K76.0, K76.2-K76.4, K76.8, K76.9, Z94.4, I85.0, I85.9, I86.4, I98.2, K70.4, K71.1, K72.1, K72.9, K76.5, K76.6, K76.7</p> <p>Mild: Kappa 0.53, sensitivity 66.7%, specificity 99.7%, PPV 44.4%, NPV 99.5%.</p> <p>Moderate/severe: Kappa 0.47, sensitivity 52.4%, specificity 98.8%, PPV 44%, NPV 99.2%.</p> | Binary: none versus mild, moderate or severe                                                 |
| Endocarditis                                                             | CorHealth Registry        | NA                                                                                                                                                                                                                                                                                                                                                                                                                                                                 | In AVR and CABG+AVR models only. Categorical: (i) None, (ii) Previous, (iii) Current/active; |
| Home oxygen within 1 year                                                | Assistive Devices Program | NA                                                                                                                                                                                                                                                                                                                                                                                                                                                                 | Binary                                                                                       |
| Peripheral artery disease/<br>peripheral vascular disease <sup>5-7</sup> | CIHI DAD, CIHI SDS, OHIP  | Any of:<br>1. Atherosclerosis/PVD of upper and lower extremity, renal, mesenteric and                                                                                                                                                                                                                                                                                                                                                                              | Binary                                                                                       |

|  |  |                                                                                                                                                                                                                                                                                                                                                                                                                                                                                                                                                                                                                                                                                                                                                                                                                                                                                                                          |  |
|--|--|--------------------------------------------------------------------------------------------------------------------------------------------------------------------------------------------------------------------------------------------------------------------------------------------------------------------------------------------------------------------------------------------------------------------------------------------------------------------------------------------------------------------------------------------------------------------------------------------------------------------------------------------------------------------------------------------------------------------------------------------------------------------------------------------------------------------------------------------------------------------------------------------------------------------------|--|
|  |  | <p>abdominal aortic systems (ICD-10-CA: I70.1, I70.2, I70.8, I70.9, I73.8, I73.9, I74.0, I74.3, I74.4, I74.5, I74.8, I74.9, I79.2)</p> <p>2. Abdominal aortic aneurysm (ICD-10-CA I71.3, I71.4)</p> <p>3. Limb/foot amputation for arterial vascular insufficiency (at least 1 ICD code and one CCP/CCI code on the same hospital record) (ICD-9: 440.2, 440.8, 440.9, 443.9, 444; ICD-10-CA: I70.2, I70.8, I70.9, I73.0, I73.8, I73.9, I74.3, I74.4, I71.3-I71.6, I71.8, I71.9; CCP: 9606, 9611, 9612, 9613, 9614, 9615; CCI: 1TK93LA, 1VC93LA, 1VG93LA, 1VQ93LA, 1WA93LA, 1WE93LA, 1WI93LA, 1WJ93LA, 1WK93LA, 1WL93LA, 1WM93LA, 1WN93LA)</p> <p>4. Aorto-femoral or limb bypass surgery, or percutaneous transluminal angioplasty of peripheral arteries (including iliac and infrainguinal) (CCI: 1JM76, 1KE50, 1KE57, 1KE76, 1KE80, 1KG50, 1KG57, 1KG76, 1KG80, 1KG87, 1KT50, 1KT57, 1KT76, 1KV80, 1KY50, 1KY80)</p> |  |
|--|--|--------------------------------------------------------------------------------------------------------------------------------------------------------------------------------------------------------------------------------------------------------------------------------------------------------------------------------------------------------------------------------------------------------------------------------------------------------------------------------------------------------------------------------------------------------------------------------------------------------------------------------------------------------------------------------------------------------------------------------------------------------------------------------------------------------------------------------------------------------------------------------------------------------------------------|--|

|                           |                               |                                                                                                                                                                                                                                                                                                 |                                                                                                                                                                                |
|---------------------------|-------------------------------|-------------------------------------------------------------------------------------------------------------------------------------------------------------------------------------------------------------------------------------------------------------------------------------------------|--------------------------------------------------------------------------------------------------------------------------------------------------------------------------------|
|                           |                               | 5. Diabetic angiopathy (ICD-10-CA: E115.0, E115.1)                                                                                                                                                                                                                                              |                                                                                                                                                                                |
| Hypertension <sup>8</sup> | Ontario Hypertension Database | ICD-9: 401, 402, 403, 404, 405<br>ICD-10-CA: I10, I11, I12, I13, I15<br>OHIP diagnosis codes: 401, 402, 403, 404, 405<br>≥1 hospitalization or ≥2 OHIP diagnosis codes in a two-year period. OR 1 OHIP followed by OHIP/hospitalization.<br>Sensitivity 72%, specificity 95%, PPV 87%, NPV 88%. | Binary                                                                                                                                                                         |
| Diabetes                  | CorHealth Registry            | NA                                                                                                                                                                                                                                                                                              | Binary                                                                                                                                                                         |
| Body mass index           | CorHealth Registry            | Calculated as weight/height <sup>2</sup>                                                                                                                                                                                                                                                        | Categorical: (i) 18-25, (ii) 26-29, (iii) 30-50. Missing are imputed using procedure and sex specific cohort mean; values <18 are recoded as 18, and values >50 recoded as 50. |
| Cancer <sup>9</sup>       | Ontario Cancer Registry       | NA                                                                                                                                                                                                                                                                                              | Categorical: (i) Never/unknown, (ii) ≤1 to <3 years, (iii) ≥3 years                                                                                                            |
| Smoking history           | CorHealth Registry            | NA                                                                                                                                                                                                                                                                                              | Categorical: (i) Never/unknown/missing, (ii) Current, (iii) Former                                                                                                             |
| Coma on index admission   | CIHI DAD                      | ICD-10-CA: R402.9, E100, E101.01, E101.11, E101.21, E110, E110.1, E111.01, E111.11, E111.21, E130, E130.1, E131.01, E131.21, E140, E140.1, E141.01, E141.21                                                                                                                                     | Binary                                                                                                                                                                         |



|                                                                                                                                   |                                     |                                                                                                                                                   |                                                                                                                                                 |
|-----------------------------------------------------------------------------------------------------------------------------------|-------------------------------------|---------------------------------------------------------------------------------------------------------------------------------------------------|-------------------------------------------------------------------------------------------------------------------------------------------------|
| Previous organ transplant <sup>10</sup>                                                                                           | Canadian Organ Replacement Registry | NA                                                                                                                                                | Binary                                                                                                                                          |
| Body surface area                                                                                                                 | CorHealth Registry                  | Calculated as $\sqrt{\text{height} \times \text{weight}} / 3600$                                                                                  | Continuous. Missing are imputed using procedure and sex specific cohort mean; values <1.4 are recoded as 1.4, values >2.6 are recoded as 2.6.   |
| Creatinine                                                                                                                        | CorHealth Registry                  | NA                                                                                                                                                | Categorical: (i) 0-119/missing, (ii) 120-179, (iii) 180+                                                                                        |
| Hematocrit                                                                                                                        | OLIS                                | NA                                                                                                                                                | Continuous. Missing are imputed using procedure and sex specific cohort mean; values <0.25 are recoded as 0.25, values >0.5 are recoded as 0.5. |
| Platelets                                                                                                                         | OLIS                                | NA                                                                                                                                                | Categorical: (i) <130, (ii) 130-400, (iii) >400. Missing are imputed using procedure specific cohort mean.                                      |
| Leukocytes                                                                                                                        | OLIS                                | NA                                                                                                                                                | Continuous. Missing are imputed using procedure specific cohort mean. Values >30 are recoded as 30.                                             |
| Previous CABG <sup>11</sup>                                                                                                       | CIHI DAD, CorHealth Registry        | From CIHI DAD:<br>CCP: 481<br>CCI: 1IJ76 (PPV = 98.3-98.5%)                                                                                       | Binary                                                                                                                                          |
| Previous transcatheter valve replacement/percutaneous valve repair <sup>11</sup>                                                  | CIHI DAD, CIHI SDS                  | CCI: 1HU80^^, 1HU90^^, 1HV80^^, 1HV90^^, 1HT80^^, 1HT90^^, 1HS80^^, 1HS90^^, where ^^="GP" or "GR"<br><br>(For any valve surgery, PPV 97.3-97.6%) | Binary                                                                                                                                          |
| Previous open valve or other open cardiac/thoracic aorta operation (aortic valve procedures are treated as a separate variable in | CIHI DAD                            | Open aortic valve procedures:<br>CCP: 4703, 4713, 4724, 4725<br>CCI: 1HV80^^ or 1HV90^^ where ^^ not = "GP" or "GR"                               | Binary                                                                                                                                          |

|                                        |  |                                                                                                                                                                                                                                                                                                                                                                                                                                                                                                                                                                                                                                                                                                                                                                                                                                                                                                                                                   |  |
|----------------------------------------|--|---------------------------------------------------------------------------------------------------------------------------------------------------------------------------------------------------------------------------------------------------------------------------------------------------------------------------------------------------------------------------------------------------------------------------------------------------------------------------------------------------------------------------------------------------------------------------------------------------------------------------------------------------------------------------------------------------------------------------------------------------------------------------------------------------------------------------------------------------------------------------------------------------------------------------------------------------|--|
| <p>AVR and CABG+AVR models)<br/>11</p> |  | <p>OHIP fee code R738, R863</p> <p>Open mitral valve procedures:<br/>CCP: 4702, 4212, 4722, 4723<br/>CCI: 1HU80^^ or 1HU90^^<br/>where ^^ not = "GP" or "GR"<br/>OHIP fee code R734-735</p> <p>Other open valve procedures:<br/>CCP: 4705, 4715, 4728, 4729,<br/>4704, 4714, 4726, 4727<br/>CCI: 1HT80^^, 1HT90^^,<br/>1HS80^^ or 1HS90^^ where<br/>^^ not="GP" or "GR"<br/>OHIP fee code R772, R728</p> <p>Open cardiac/thoracic aorta<br/>operations:<br/>CCI: 1I*XXYY (where *=A to<br/>S, and (XX=76 OR YY=LA,<br/>TQ, VS, MF or NA)), 1HJ76,<br/>1HJ82LA, 1HM78LA,<br/>1HM80LA, 1HN71LA,<br/>1HN80LA, 1HN87LA,<br/>1HP53LAQP, 1HP54LAQP,<br/>1HP55LAQP, 1HP71LA,<br/>1HP76, 1HP78LA, 1HP80LA,<br/>1HP82LA, 1HP83LA,<br/>1HP87LA, 1HR71LA,<br/>1HR80LA, 1HR80STFL,<br/>1HR84LA, 1HR87LA,<br/>1HY85, 1HZ85,<br/>1HZ34LAXXN, 1HZ53LA,<br/>1HZ53QA, 1HZ53SY,<br/>1HZ55LA, 1HZ55QA,<br/>1HZ56LA, 1HZ80LA,<br/>1HZ80WKAG, 1HZ85LA,<br/>1HZ87LA</p> |  |
|----------------------------------------|--|---------------------------------------------------------------------------------------------------------------------------------------------------------------------------------------------------------------------------------------------------------------------------------------------------------------------------------------------------------------------------------------------------------------------------------------------------------------------------------------------------------------------------------------------------------------------------------------------------------------------------------------------------------------------------------------------------------------------------------------------------------------------------------------------------------------------------------------------------------------------------------------------------------------------------------------------------|--|

|                                                                         |                              |                                                                                                                                                                                                                                                                          |                                                                                    |
|-------------------------------------------------------------------------|------------------------------|--------------------------------------------------------------------------------------------------------------------------------------------------------------------------------------------------------------------------------------------------------------------------|------------------------------------------------------------------------------------|
|                                                                         |                              | (For any valve surgery, PPV 97.3-97.6%)                                                                                                                                                                                                                                  |                                                                                    |
| Number of previous cardiovascular surgeries                             | CIHI DAD                     | Includes CCI procedures (count maximum of 1 per day): 1HH59LA, 1HH59LA, 1HP78, 1IB, 1IA, 1IC, 1ID, 1IC, 1IC, 1ID, 1HM78LA, 1LZ37LAQM, 1LZ37GPQM, 1HA87, 1HZ53LAKP, 1HZ55LAKP, 1HZ80, 1HY85, 1HZ85, 1GT85, 1HP53LA, 1HP54LA, 1HP55LA, 1IJ76, 1HS, 1HT, 1HU, 1HV, 1HW, 1HX | Categorical: (i) None prior to this surgery, (ii) 1 or more previous surgeries     |
| History of PCI and timing <sup>11</sup>                                 | CIHI DAD, CIHI SDS           | CCP: 4802, 4803<br>CCI: 1IJ50, 1IJ54 or 1IJ57GQ<br>(PPV = 96.0%)                                                                                                                                                                                                         | Categorical: (i) No, (ii) Yes >1 day prior, (iii) Yes within 1 day of surgery date |
| Previous implantable cardioverter defibrillator <sup>12,13</sup>        | CIHI DAD, CIHI SDS, OHIP     | CCP: 4974, 4988<br>CCI: 1HZ53GRFS, 1HZ53HAFS, 1HZ53LAFS, 1HZ53SYFS, 1HZ55GPFS, 1HZ55LAFS, 1HZ55QAFS, 2HZ07FS, 2HZ07NR<br>OHIP fee code: G317, G321, R753, R761                                                                                                           | Binary                                                                             |
| Moribund (not expected to live between admission date and surgery date) | OHIP                         | OHIP fee code E016                                                                                                                                                                                                                                                       | Binary                                                                             |
| New York Heart Association (NYHA) class                                 | CorHealth Registry           | NA                                                                                                                                                                                                                                                                       | Categorical: Class I to IV, and missing                                            |
| Shock, pre-op ECMO, pre-op CBA, pr-eop IABP, resuscitation              | CIHI DAD, CorHealth Registry | Shock:                                                                                                                                                                                                                                                                   | Binary                                                                             |

|                                                                                                                                    |                    |                                                                                                                                                                                                                                                                                                                                                                                                                                        |                                                                                         |
|------------------------------------------------------------------------------------------------------------------------------------|--------------------|----------------------------------------------------------------------------------------------------------------------------------------------------------------------------------------------------------------------------------------------------------------------------------------------------------------------------------------------------------------------------------------------------------------------------------------|-----------------------------------------------------------------------------------------|
| (within 1 day or on admission), or recent (within 30 days) ventricular tachycardia/fibrillation (for AVR and CABG+AVR models only) |                    | <p>ICD-10-CA: R57.0 or flag in CorHealth registry</p> <p>Pre-op ECMO:<br/>CCI: 1LZ37GPQM or 1LZ37LAQM</p> <p>Pre-op CBA:<br/>CCI: 1HP53GPQP</p> <p>Pre-op IABP:<br/>Flag in CorHealth Registry</p> <p>Resuscitation:<br/>CCI: 1GZ30CJ, 1GZ30CJNB, 1GZ30JH, 1HZ30JN or 1HZ30JY within 1 day prior to surgery date; or flag in CorHealth registry</p> <p>Ventricular tachycardia/fibrillation:<br/>ICD-10-CA: I47.0, I47.2, or I49.0</p> |                                                                                         |
| Status                                                                                                                             | CIHI DAD           | <p>Wait at home = Hospital admission category = elective and admission date <math>\leq</math> 1 day before surgery date</p> <p>Wait in hospital/urgent if Hospital admission category = elective and admission date <math>&gt;</math> 1 day before surgery date, or Hospital admission category = urgent.</p>                                                                                                                          | Categorical: (i) Wait at home, (ii) Wait in hospital/urgent                             |
| Cardiac presentation on admission                                                                                                  | CorHealth Registry | NA                                                                                                                                                                                                                                                                                                                                                                                                                                     | Categorical: (i) STEMI, (ii) NSTEMI, (iii) Unstable angina, (iv) Other (i.e., elective, |

|                                                                                    |                         |                                                                                                                             |                                                                                                                                                           |
|------------------------------------------------------------------------------------|-------------------------|-----------------------------------------------------------------------------------------------------------------------------|-----------------------------------------------------------------------------------------------------------------------------------------------------------|
|                                                                                    |                         |                                                                                                                             | stable coronary disease, rule out coronary artery disease, or missing)                                                                                    |
| Recent myocardial infarction (≤30 days before referral)                            | CorHealth Registry      | NA                                                                                                                          | Binary                                                                                                                                                    |
| Atrial fibrillation or flutter                                                     | CIHI DAD, NACRS         | ICD-10-CA: I48                                                                                                              | Categorical: (i) none, (ii) recent (within 30 days) (iii) remote (>30 days)                                                                               |
| Heart block or bradycardia                                                         | CIHI DAD, NACRS         | ICD-10-CA: I44.2, I45.3, I49.5                                                                                              | Categorical: (i) none, (ii) recent (within 30 days) (iii) remote (>30 days)                                                                               |
| Ventricular tachycardia or fibrillation                                            | CIHI DAD, NACRS         | ICD-10-CA: I47.0, I47.2, or I490                                                                                            | Categorical: (i) none, (ii) recent (within 30 days) (iii) remote (>30 days); for AVR and CABG+AVR models, combined with shock/ECMO/IABP/CBA/resuscitation |
| History of radiation treatment to mediastinum/heart                                | Ontario Cancer Registry | NA                                                                                                                          | Binary                                                                                                                                                    |
| Left ventricular ejection fraction                                                 | CorHealth Registry      | NA                                                                                                                          | Categorical: (i) ≥35%, (ii) <35%, (iii) Missing                                                                                                           |
| Left main disease                                                                  | CorHealth Registry      | NA                                                                                                                          | Binary                                                                                                                                                    |
| Proximal left anterior descending artery (LAD) stenosis                            | CorHealth Registry      | NA                                                                                                                          | Binary                                                                                                                                                    |
| Number of diseased coronary vessels                                                | CorHealth Registry      | NA                                                                                                                          | Categorical: (i) 1, (ii) 2, (iii) 3, (iv) Unknown                                                                                                         |
| Mitral regurgitation                                                               | CorHealth Registry      | NA                                                                                                                          | Binary                                                                                                                                                    |
| Aortic stenosis or regurgitation                                                   | CorHealth Registry      | NA                                                                                                                          | Binary                                                                                                                                                    |
| Tricuspid insufficiency                                                            | CIHI DAD                | ICD-9: 397.0<br>ICD-10-CA: I07.1                                                                                            | Binary                                                                                                                                                    |
| Thoracic aorta disease (excludes aortic dissections and abdominal aortic aneurysm) | CIHI DAD                | ICD-9 441.1, 441.2, 441.6, 441.7<br>ICD-10-CA I71.1, I71.2, I71.5, I71.6                                                    | Binary                                                                                                                                                    |
| Intensive/critical care unit admission within 48 hours <sup>14</sup>               | CIHI DAD                | Special care unit (SCU) code 10, 20, 30, 40 or 45 (includes admission to medical/surgical intensive care, critical care and | Binary                                                                                                                                                    |

|                                           |          |                                                                                                                                                                    |                                                 |
|-------------------------------------------|----------|--------------------------------------------------------------------------------------------------------------------------------------------------------------------|-------------------------------------------------|
|                                           |          | cardiac care units) (sensitivity 96%, specificity 90%, PPV 35%, NPV 100%)                                                                                          |                                                 |
| Hospital Frailty Risk Score <sup>15</sup> | CIHI DAD | Look back five years<br><br>Kappa 0.22 (95% CI 0.15-30) compared with dichotomized Fried scale; 0.30 (95% CI 0.22-0.38) compared with dichotomized Rockwood scale. | Categorical: (i) <1.0, (ii) 1.0-3.0, (iii) >3.0 |

AVR indicates aortic valve replacement; CABG, coronary artery bypass graft; CBA, catheter-based assist device; CCI, Canadian Classification of Health Interventions; CCP, Canadian Classification of Diagnostic, Therapeutic, and Surgical Procedures; CIHI DAD, Canadian Institute for Health Information Discharge Abstract Database; CIHI SDS, Canadian Institute for Health Information Same-day Surgery database; ECMO, extracorporeal membrane oxygenation; IABP, intra-aortic balloon pump; ICD, International Classification of Diseases; NA, not applicable; NACRS, National Ambulatory Care Reporting System; NPV, negative predictive value; NSTEMI, non-ST-elevation myocardial infarction OHIP, Ontario Health Insurance Plan Physician Claims Database; OLIS, Ontario Laboratories Information System; PCI, percutaneous coronary intervention; PPV, positive predictive value; RPBB, Registered Persons Database; STEMI, ST-elevation myocardial infarction; TIA, transient ischemic attack.

\* Where a variable's data source is the CorHealth Registry, information is obtained from the patient's electronic medical record.

**Supplemental Table 3.** Baseline characteristics of CABG derivation and validation cohorts

| Characteristic                     | FY2017 &<br>FY2018<br>(N=13,435)          | FY2015 &<br>FY2016<br>(N=13,447) | FY2019<br>(N=6430) |
|------------------------------------|-------------------------------------------|----------------------------------|--------------------|
|                                    | <i>n (%)</i> , unless otherwise specified |                                  |                    |
| Age on procedure date              |                                           |                                  |                    |
| Mean (SD)                          | 66.3 (9.4)                                | 65.9 (9.7)                       | 66.2 (9.5)         |
| Median (IQR)                       | 67 (60-73)                                | 66 (59-73)                       | 67 (60-73)         |
| Male sex                           | 10,820 (80.5)                             | 10,785 (80.2)                    | 5243 (81.5)        |
| Ethnicity                          |                                           |                                  |                    |
| Chinese                            | 259 (1.9)                                 | 265 (2.0)                        | 155 (2.4)          |
| South Asian                        | 730 (5.4)                                 | 641 (4.8)                        | 332 (5.2)          |
| Other                              | 12,446 (92.6)                             | 12,541 (93.3)                    | 5943 (92.4)        |
| Prior stroke                       | 358 (2.7)                                 | 352 (2.6)                        | 196 (3.0)          |
| Prior transient ischemic attack    | 351 (2.6)                                 | 353 (2.6)                        | 190 (3.0)          |
| Prior carotid endarterectomy/stent | 158 (1.2)                                 | 162 (1.2)                        | 72 (1.1)           |
| Chronic lung disease               | 1008 (7.5)                                | 1,049 (7.8)                      | 457 (7.1)          |
| Dialysis                           | 227 (1.7)                                 | 236 (1.8)                        | 145 (2.3)          |
| Liver disease                      | 152 (1.1)                                 | 143 (1.1)                        | 63 (1.0)           |
| Home oxygen in prior 1 year        | 12 (0.1)                                  | 25 (0.2)                         | *1-5 (0.02-0.08)   |
| Peripheral artery/vascular disease | 599 (4.5)                                 | 664 (4.9)                        | 267 (4.2)          |
| Hypertension                       | 11,394 (84.8)                             | 11,359 (84.5)                    | 4412 (68.6)        |
| Diabetes                           | 5562 (41.4)                               | 5577 (41.5)                      | 2694 (41.9)        |
| Body mass index, kg/m <sup>2</sup> |                                           |                                  |                    |
| Mean (SD)                          | 29.3 (9.3)                                | 29.9 (36.0)                      | 29.3 (8.7)         |
| Median (IQR)                       | 28 (25-32)                                | 28 (25-32)                       | 28 (25-32)         |
| Missing                            | 673 (5.0%)                                | 861 (6.4)                        | 424 (6.6)          |
| Body surface area, m <sup>2</sup>  |                                           |                                  |                    |
| Mean (SD)                          | 2.00 (0.25)                               | 2.00 (0.24)                      | 2.00 (0.24)        |
| Median (IQR)                       | 2 (2-2)                                   | 2 (2-2)                          | 2 (2-2)            |
| Missing                            | 673 (5.0%)                                | 861 (6.4)                        | 424 (6.6)          |
| Cancer/Time since diagnosis        |                                           |                                  |                    |
| No cancer                          | 11,985 (89.2)                             | 11,908 (88.6)                    | 5702 (88.7)        |
| <1 to 3 years                      | 364 (2.7)                                 | 420 (3.1)                        | 209 (3.3)          |
| ≥3 years                           | 1086 (8.1)                                | 1119 (8.3)                       | 519 (8.1)          |
| Smoking history                    |                                           |                                  |                    |
| Current                            | 2806 (20.9)                               | 2866 (21.3)                      | 1283 (20.0)        |
| Former                             | 4373 (32.5)                               | 4741 (35.3)                      | 1999 (31.1)        |
| Never                              | 6256 (46.6)                               | 5840 (43.4)                      | 3148 (49.0)        |
| Coma on admission                  | *1-5 (0.007-0.04)                         | *1-5 (0.007-0.04)                | *1-5 (0.02-0.08)   |
| Organ transplant                   | 60 (0.4)                                  | 44 (0.3)                         | 18 (0.3)           |
| Creatinine (µmol/L)                |                                           |                                  |                    |
| 0-119                              | 11,299 (84.1)                             | 11,303 (84.1)                    | 5175 (80.5)        |
| 120-179                            | 1210 (9.0)                                | 1147 (8.5)                       | 553 (8.6)          |
| 180+                               | 535 (4.0)                                 | 473 (3.5)                        | 264 (4.1)          |
| Missing                            | 391 (2.9)                                 | 524 (3.9)                        | 438 (6.8)          |
| Hematocrit                         |                                           |                                  |                    |
| Mean (SD)                          | 0.41 (0.05)                               | 0.41 (0.05)                      | 0.42 (0.04)        |
| Median (IQR)                       | 0 (0-0)                                   | 0 (0-0)                          | 0 (0-0)            |

|                                                                        |                                             |               |                                            |
|------------------------------------------------------------------------|---------------------------------------------|---------------|--------------------------------------------|
| Missing                                                                | 571 (4.3%)                                  | 215 (1.6)     | 534 (8.3)                                  |
| Platelets (x10 <sup>3</sup> /mm <sup>3</sup> )                         |                                             |               |                                            |
| Mean (SD)                                                              | 226.6 (65.7)                                | 223.0 (66.2)  | 233.1 (62.8)                               |
| Median (IQR)                                                           | 219 (183-260)                               | 216 (180-255) | 226 (193-263)                              |
| Missing                                                                | 577 (4.3%)                                  | 215 (1.6)     | 534 (8.3)                                  |
| Leukocytes (x10 <sup>9</sup> /L)                                       |                                             |               |                                            |
| Mean (SD)                                                              | 7.7 (3.9)                                   | 7.9 (2.4)     | 7.5 (2.3)                                  |
| Median (IQR)                                                           | 7 (6-9)                                     | 8 (6-9)       | 7 (6-9)                                    |
| Missing                                                                | 573 (4.3%)                                  | 215 (1.6)     | 534 (8.3)                                  |
| Previous CABG                                                          | 84 (0.6)                                    | 95 (0.7)      | 30 (0.5)                                   |
| Previous transcatheter valve                                           | 0 (0.0)                                     | 0 (0.0)       | 0 (0.0)                                    |
| Previous open valve, or other open cardiac or thoracic aorta operation | 80 (0.6)                                    | 72 (0.5)      | 32 (0.5)                                   |
| Number of previous cardiovascular surgeries                            |                                             |               |                                            |
| None                                                                   | 13,305 (99)                                 | 13,330 (99.1) | 6375 (99.1)                                |
| ≥1                                                                     | 130 (1)                                     | 117 (0.9)     | 55 (0.9)                                   |
| History and timing of PCI                                              |                                             |               |                                            |
| Within 1 day                                                           | *1-5 (0.007-0.04)<br>*2288-2292 (17.0-17.0) | 6 (0.04)      | *1-5 (0.02-0.08)<br>*1142-1146 (17.8-17.8) |
| >1 day prior                                                           | 11,142 (82.9)                               | 2082 (15.5)   | 5283 (82.2)                                |
| None                                                                   |                                             | 11,359 (84.5) |                                            |
| Previous implantable cardioverter defibrillator                        | 62 (0.5)                                    | 69 (0.5)      | 44 (0.7)                                   |
| Shock or pre-op ECMO, IABP or CBA                                      | 208 (1.5)                                   | 240 (1.8)     | 97 (1.5)                                   |
| Resuscitation within 1 day or on admission                             | 152 (1.1)                                   | 136 (1.0)     | 47 (0.7)                                   |
| Moribund                                                               | 464 (3.5)                                   | 445 (3.3)     | 243 (3.8)                                  |
| New York Heart Association (NYHA) class                                |                                             |               |                                            |
| 1                                                                      | 4754 (35.4)                                 | 4865 (36.2)   | 2033 (31.6)                                |
| 2                                                                      | 1254 (9.3)                                  | 1221 (9.1)    | 683 (10.6)                                 |
| 3                                                                      | 626 (4.7)                                   | 623 (4.6)     | 327 (5.1)                                  |
| 4                                                                      | 149 (1.1)                                   | 195 (1.5)     | 62 (1.0)                                   |
| No symptoms/missing/NA/unknown                                         | 6652 (49.5)                                 | 6543 (48.7)   | 3325 (51.7)                                |
| Status                                                                 |                                             |               |                                            |
| Urgent or waiting in hospital                                          | 7784 (57.9)                                 | 7824 (58.2)   | 3852 (59.9)                                |
| Waiting at home                                                        | 5651 (42.1)                                 | 5623 (41.8)   | 2578 (40.1)                                |
| Cardiac presentation on admission                                      |                                             |               |                                            |
| STEMI                                                                  | 876 (6.5)                                   | 894 (6.6)     | 431 (6.7)                                  |
| NSTEMI                                                                 | 3589 (26.7)                                 | 3608 (26.8)   | 1858 (28.9)                                |
| Unstable angina                                                        | 2338 (17.4)                                 | 2531 (18.8)   | 1064 (16.5)                                |
| Other                                                                  | 6632 (49.4)                                 | 6414 (47.7)   | 3077 (47.9)                                |
| Recent myocardial infarction                                           | 4770 (35.5)                                 | 4806 (35.7)   | 2375 (36.9)                                |
| Atrial fibrillation or flutter                                         |                                             |               |                                            |
| None                                                                   | 12,196 (90.8)                               | 12,272 (91.3) | 5869 (91.3)                                |
| Recent (within 30 days)                                                | 861 (6.4)                                   | 840 (6.2)     | 390 (6.1)                                  |
| Remote (>30 days)                                                      | 378 (2.8)                                   | 335 (2.5)     | 171 (2.7)                                  |
| Heart block or bradycardia                                             |                                             |               |                                            |
| None                                                                   | 13,279 (98.8)                               | 13,319 (99.0) | 6,356 (98.8)                               |
| Recent (within 30 days)                                                | 58 (0.4)                                    | 38 (0.3)      | 27 (0.4)                                   |
| Remote (>30 days)                                                      | 98 (0.7)                                    | 90 (0.7)      | 47 (0.7)                                   |
| Ventricular tachycardia or fibrillation                                | 13,156 (97.9)                               | 13,195 (98.1) | 6271 (97.5)                                |

Appendix 1, as supplied by the authors. Appendix to: Sun LY, Chu A, Tam DY, et al. Derivation and validation of predictive indices for 30-day mortality after coronary and valvular surgery in Ontario, Canada. *CMAJ* 2021. doi: 10.1503/cmaj.202901. Copyright © 2021 The Author(s) or their employer(s). To receive this resource in an accessible format, please contact us at [cmajgroup@cmaj.ca](mailto:cmajgroup@cmaj.ca).



|                                           |                   |                   |                  |
|-------------------------------------------|-------------------|-------------------|------------------|
| None                                      |                   |                   |                  |
| Recent (within 30 days)                   | 165 (1.2)         | 149 (1.1)         | 85 (1.3)         |
| Remote (>30 days)                         | 114 (0.8)         | 103 (0.8)         | 74 (1.2)         |
| History of mediastinal radiation          | *1-5 (0.007-0.04) | *1-5 (0.007-0.04) | *1-5 (0.02-0.08) |
| Left ventricular ejection fraction (LVEF) |                   |                   |                  |
| ≥50%                                      | 8872 (66.0)       | 8,531 (63.4)      | 4,283 (66.6)     |
| 35-49%                                    | 2825 (21.0)       | 2,950 (21.9)      | 1,246 (19.4)     |
| 20-34%                                    | 944 (7.0)         | 1,105 (8.2)       | 451 (7.0)        |
| <20%                                      | 162 (1.2)         | 212 (1.6)         | 65 (1.0)         |
| Missing                                   | 632 (4.7)         | 649 (4.8)         | 385 (6.0)        |
| Left main disease                         | 4042 (30.1)       | 4155 (30.9)       | 2003 (31.2)      |
| Proximal LAD stenosis                     | 7532 (56.1)       | 7440 (55.3)       | 3900 (60.7)      |
| Number of diseased coronary vessels       |                   |                   |                  |
| Unknown                                   | 120 (0.9)         | 109 (0.8)         | 49 (0.8)         |
| 1                                         | 630 (4.7)         | 699 (5.2)         | 311 (4.8)        |
| 2                                         | 3913 (29.1)       | 4251 (31.6)       | 1800 (28.0)      |
| 3                                         | 8772 (65.3)       | 8388 (62.4)       | 4270 (66.4)      |
| Mitral regurgitation                      | 31 (0.2)          | 49 (0.4)          | 27 (0.4)         |
| Aortic stenosis or regurgitation          | 37 (0.3)          | 36 (0.3)          | 28 (0.4)         |
| Severe tricuspid insufficiency            | *1-5 (0.007-0.04) | *1-5 (0.007-0.04) | *1-5 (0.02-0.08) |
| Thoracic aorta disease                    | 25 (0.2)          | 19 (0.1)          | 19 (0.3)         |
| ICU or CCU admission within 48 hours      | 551 (4.1)         | 577 (4.3)         | 247 (3.8)        |
| Hospital Frailty Risk Score               |                   |                   |                  |
| Mean (SD)                                 | 2.9 (3.8)         | 2.9 (3.8)         | 2.8 (3.9)        |
| Median (IQR)                              | 1 (0-4)           | 1 (0-4)           | 1 (0-4)          |

CABG indicates coronary artery bypass graft; CBA, catheter-based assist device; CCU, critical care unit; ECMO, extracorporeal membrane oxygenation; IABP, intra-aortic balloon pump; ICU, intensive care unit; IQR, interquartile range; LAD, left anterior descending artery; NSTEMI, non-ST-elevation myocardial infarction; PCI, percutaneous coronary intervention; SD, standard deviation; STEMI, ST-elevation myocardial infarction.

\* Data suppressed due to small counts.

**Supplemental Table 4.** Baseline characteristics of AVR derivation and validation cohorts

| Characteristic                     | FY2017 &<br>FY2018<br>(N=1970)            | FY2015 &<br>FY2016<br>(N=1946) | FY 2019<br>(N=777) |
|------------------------------------|-------------------------------------------|--------------------------------|--------------------|
|                                    | <i>n (%)</i> , unless otherwise specified |                                |                    |
| Age on procedure date              |                                           |                                |                    |
| Mean (SD)                          | 68.3 (10.2)                               | 68.8 (11.3)                    | 65.9 (10.6)        |
| Median (IQR)                       | 70 (63-76)                                | 70 (63-77)                     | 67 (61-73)         |
| Male sex                           | 1236 (62.7)                               | 1181 (60.7)                    | 494 (63.6)         |
| Ethnicity                          |                                           |                                |                    |
| Chinese                            | 20 (1.0)                                  | 18 (0.9)                       | 6 (0.8)            |
| South Asian                        | 22 (1.1)                                  | 27 (1.4)                       | 8 (1.0)            |
| Other                              | 1928 (97.9)                               | 1901 (97.7)                    | 763 (98.2)         |
| Prior stroke                       | 75 (3.8)                                  | 67 (3.4)                       | 34 (4.4)           |
| Prior transient ischemic attack    | 62 (3.1)                                  | 57 (2.9)                       | 29 (3.7)           |
| Prior carotid endarterectomy/stent | 22 (1.1)                                  | 11 (0.6)                       | *1-5 (0.1-0.6)     |
| Chronic lung disease               | 193 (9.8)                                 | 213 (10.9)                     | 79 (10.2)          |
| Dialysis                           | 31 (1.6)                                  | 19 (1.0)                       | 10 (1.3)           |
| Liver disease                      | 33 (1.7)                                  | 43 (2.2)                       | 16 (2.1)           |
| Endocarditis                       |                                           |                                |                    |
| Current                            | 66 (3.4)                                  | 39 (2.0)                       | 29 (3.7)           |
| Previous                           | 23 (1.2)                                  | 30 (1.5)                       | 12 (1.5)           |
| Home oxygen in prior 1 year        | 7 (0.4)                                   | *1-5 (0.05-0.3)                | 0 (0.0)            |
| Peripheral artery/vascular disease | 67 (3.4)                                  | 81 (4.2)                       | 29 (3.7)           |
| Hypertension                       | 1530 (77.7)                               | 1531 (78.7)                    | 526 (67.7)         |
| Diabetes                           | 534 (27.1)                                | 499 (25.6)                     | 192 (24.7)         |
| Body mass index, kg/m <sup>2</sup> |                                           |                                |                    |
| Mean (SD)                          | 30.5 (9.7)                                | 30.3 (12.1)                    | 29.8 (6.5)         |
| Median (IQR)                       | 29 (26-34)                                | 29 (26-33)                     | 29 (25-33)         |
| Missing                            | 91 (4.6%)                                 | 134 (6.9)                      | 58 (7.5)           |
| Body surface area, m <sup>2</sup>  |                                           |                                |                    |
| Mean (SD)                          | 2.00 (0.27)                               | 1.97 (0.26)                    | 1.99 (0.26)        |
| Median (IQR)                       | 2 (2-2)                                   | 2 (2-2)                        | 2 (2-2)            |
| Missing                            | 91 (4.6%)                                 | 134 (6.9)                      | 58 (7.5)           |
| Cancer/Time since diagnosis        |                                           |                                |                    |
| No cancer                          | 1646 (83.6)                               | 1619 (83.2)                    | 666 (85.7)         |
| <1 to 3 years                      | 71 (3.6)                                  | 85 (4.4)                       | 33 (4.2)           |
| ≥3 years                           | 253 (12.8)                                | 242 (12.4)                     | 78 (10.0)          |
| Smoking history                    |                                           |                                |                    |
| Current                            | 255 (12.9)                                | 259 (13.3)                     | 129 (16.6)         |
| Former                             | 634 (32.2)                                | 619 (31.8)                     | 211 (27.2)         |
| Never                              | 1081 (54.9)                               | 1068 (54.9)                    | 437 (56.2)         |
| Coma on admission                  | 0 (0)                                     | 0 (0)                          | 0 (0)              |
| Organ transplant                   | 13 (0.7)                                  | 10 (0.5)                       | 7 (0.9)            |
| Creatinine (µmol/L)                |                                           |                                |                    |
| 0-119                              | 1687 (85.6)                               | 1609 (82.7)                    | 641 (82.5)         |
| 120-179                            | 160 (8.1)                                 | 157 (8.1)                      | 60 (7.7)           |
| 180+                               | 53 (2.7)                                  | 52 (2.7)                       | 23 (3.0)           |

|                                                                        |                 |                 |                |
|------------------------------------------------------------------------|-----------------|-----------------|----------------|
| Missing                                                                | 70 (3.6)        | 128 (6.6)       | 53 (6.8)       |
| Hematocrit                                                             |                 |                 |                |
| Mean (SD)                                                              | 0.40 (0.05)     | 0.40 (0.05)     | 0.41 (0.04)    |
| Median (IQR)                                                           | 0 (0-0)         | 0 (0-0)         | 0 (0-0)        |
| Missing                                                                | 55 (2.8%)       | 14 (0.7)        | 53 (6.8)       |
| Platelets (x10 <sup>3</sup> /mm <sup>3</sup> )                         |                 |                 |                |
| Mean (SD)                                                              | 217.1 (69.0)    | 214.2 (69.9)    | 229.8 (66.4)   |
| Median (IQR)                                                           | 214 (174-250)   | 208 (171-247)   | 219 (188-262)  |
| Missing                                                                | 55 (2.8%)       | 14 (0.7)        | 53 (6.8)       |
| Leukocytes (x10 <sup>9</sup> /L)                                       |                 |                 |                |
| Mean (SD)                                                              | 7.4 (2.6)       | 7.5 (2.7)       | 7.4 (2.4)      |
| Median (IQR)                                                           | 7 (6-8)         | 7 (6-9)         | 7 (6-8)        |
| Missing                                                                | 56 (2.8%)       | 14 (0.7)        | 53 (6.8)       |
| Previous CABG                                                          | 48 (2.4)        | 58 (3.0)        | 15 (1.9)       |
| Previous transcatheter valve                                           | *1-5 (0.05-0.3) | *1-5 (0.05-0.3) | *1-5 (0.1-0.6) |
| Previous open valve, or other open cardiac or thoracic aorta operation | 168 (8.5)       | 142 (7.3)       | 68 (8.8)       |
| Number of previous cardiovascular surgeries                            |                 |                 |                |
| None                                                                   | 1818 (92.3)     | 1821 (93.6)     | 715 (92.0)     |
| ≥1                                                                     | 152 (7.7)       | 125 (6.4)       | 62 (8.0)       |
| History and timing of PCI                                              |                 |                 |                |
| Within 1 day                                                           |                 |                 |                |
| >1 day prior                                                           | 142 (7.2)       | 128 (6.6)       | 41 (5.3)       |
| None                                                                   | 1828 (92.8)     | 1818 (93.4)     | 736 (94.7)     |
| Previous implantable cardioverter defibrillator                        | 13 (0.7)        | 13 (0.7)        | 6 (0.8)        |
| Shock or pre-op ECMO, IABP or CBA                                      | 17 (0.9)        | 13 (0.7)        | 8 (1.0)        |
| Resuscitation within 1 day or on admission                             | 28 (1.4)        | 21 (1.1)        | *1-5 (0.1-0.6) |
| Moribund                                                               | 76 (3.9)        | 55 (2.8)        | 34 (4.4)       |
| New York Heart Association (NYHA) class                                |                 |                 |                |
| 1                                                                      | 442 (22.4)      | 484 (24.9)      | 196 (25.2)     |
| 2                                                                      | 703 (35.7)      | 653 (33.6)      | 262 (33.7)     |
| 3                                                                      | 550 (27.9)      | 554 (28.5)      | 190 (24.5)     |
| 4                                                                      | 66 (3.4)        | 75 (3.9)        | 27 (3.5)       |
| No symptoms/missing/NA/unknown                                         | 209 (10.6)      | 180 (9.2)       | 102 (13.1)     |
| Status                                                                 |                 |                 |                |
| Urgent or waiting in hospital                                          | 375 (19.0)      | 409 (21.0)      | 183 (23.6)     |
| Waiting at home                                                        | 1595 (81.0)     | 1537 (79.0)     | 594 (76.4)     |
| Cardiac presentation on admission                                      |                 |                 |                |
| STEMI                                                                  | *1-5 (0.05-0.3) | *1-5 (0.05-0.3) | *1-5 (0.1-0.6) |
| NSTEMI                                                                 | 11 (0.6)        | 16 (0.8)        | 6 (0.8)        |
| Unstable angina                                                        | *7-11 (0.4-0.6) | *8-12 (0.4-0.6) | *1-5 (0.1-0.6) |
| Other                                                                  | 1947 (98.8)     | 1917 (98.5)     | 765 (98.5)     |
| Recent myocardial infarction                                           | 46 (2.3)        | 52 (2.7)        | 33 (4.2)       |
| Atrial fibrillation or flutter                                         |                 |                 |                |
| None                                                                   | 1628 (82.6)     | 1591 (81.8)     | 658 (84.7)     |
| Recent (within 30 days)                                                | 210 (10.7)      | 206 (10.6)      | 75 (9.7)       |
| Remote (>30 days)                                                      | 132 (6.7)       | 149 (7.7)       | 44 (5.7)       |
| Heart block or bradycardia                                             | 1935 (98.2)     | 1899 (97.6)     | 755 (97.2)     |

Appendix 1, as supplied by the authors. Appendix to: Sun LY, Chu A, Tam DY, et al. Derivation and validation of predictive indices for 30-day mortality after coronary and valvular surgery in Ontario, Canada. *CMAJ* 2021. doi: 10.1503/cmaj.202901. Copyright © 2021 The Author(s) or their employer(s). To receive this resource in an accessible format, please contact us at [cmajgroup@cmaj.ca](mailto:cmajgroup@cmaj.ca).

|                                           |                  |                 |                  |
|-------------------------------------------|------------------|-----------------|------------------|
| None                                      |                  |                 |                  |
| Recent (within 30 days)                   | 16 (0.8)         | 11 (0.6)        | 11 (1.4)         |
| Remote (>30 days)                         | 19 (1.0)         | 36 (1.8)        | 11 (1.4)         |
| Ventricular tachycardia or fibrillation   |                  |                 |                  |
| None                                      | 1947 (98.8)      | 1912 (98.3)     | 768 (98.8)       |
| Recent (within 30 days)                   | *1-5 (0.05-0.3)  | 9 (0.5)         | *1-5 (0.1-0.6)   |
| Remote (>30 days)                         | *18-22 (0.9-1.1) | 25 (1.3)        | *4-8 (0.5-1.0)   |
| History of mediastinal radiation          | 0 (0.0)          | *1-5 (0.05-0.3) | 0 (0.0)          |
| Left ventricular ejection fraction (LVEF) |                  |                 |                  |
| ≥50%                                      | 1597 (81.1)      | 1611 (82.8)     | 614 (79.0)       |
| 35-49%                                    | 190 (9.6)        | 180 (9.2)       | 83 (10.7)        |
| 20-34%                                    | 84 (4.3)         | 81 (4.2)        | 30 (3.9)         |
| <20%                                      | 10 (0.5)         | 15 (0.8)        | *1-5 (0.1-0.6)   |
| Missing                                   | 89 (4.5)         | 59 (3.0)        | *45-49 (5.8-6.3) |
| Left main disease                         | *1-5 (0.05-0.3)  | 13 (0.7)        | *1-5 (0.1-0.6)   |
| Proximal LAD stenosis                     | 24 (1.2)         | 36 (1.8)        | 8 (1.0)          |
| Number of diseased coronary vessels       |                  |                 |                  |
| Unknown                                   | 1821 (92.4)      | 1766 (90.8)     | 724 (93.2)       |
| 1                                         | 110 (5.6)        | 123 (6.3)       | 39 (5.0)         |
| 2                                         | 21 (1.1)         | 34 (1.7)        | *9-13 (1.2-1.7)  |
| 3                                         | 18 (0.9)         | 23 (1.2)        | *1-5 (0.1-0.6)   |
| Mitral regurgitation                      | 19 (1.0)         | 18 (0.9)        | 7 (0.9)          |
| Aortic stenosis or regurgitation          | 1866 (94.7)      | 1892 (97.2)     | 735 (94.6)       |
| Severe tricuspid insufficiency            | *1-5 (0.05-0.3)  | *1-5 (0.05-0.3) | *1-5 (0.1-0.6)   |
| Thoracic aorta disease                    | 20 (1.0)         | 14 (0.7)        | *1-5 (0.1-0.6)   |
| ICU or CCU admission within 48 hours      | 26 (1.3)         | 31 (1.6)        | 16 (2.1)         |
| Hospital Frailty Risk Score               |                  |                 |                  |
| Mean (SD)                                 | 2.6 (4.2)        | 2.8 (4.3)       | 2.5 (4.3)        |
| Median (IQR)                              | 1 (0-4)          | 1 (0-4)         | 0 (0-3)          |

CABG indicates coronary artery bypass graft; CBA, catheter-based assist device; CCU, critical care unit; ECMO, extracorporeal membrane oxygenation; IABP, intra-aortic balloon pump; ICU, intensive care unit; IQR, interquartile range; LAD, left anterior descending artery; NSTEMI, non-ST-elevation myocardial infarction; PCI, percutaneous coronary intervention; SD, standard deviation; STEMI, ST-elevation myocardial infarction.

\* Data suppressed due to small counts.

**Supplemental Table 5.** Baseline characteristics of CABG+AVR derivation and validation cohorts

| Characteristic                     | FY2017 &<br>FY2018<br>(N=1510)            | FY2015 &<br>FY2016<br>(N=1601) | FY 2019<br>(N=555) |
|------------------------------------|-------------------------------------------|--------------------------------|--------------------|
|                                    | <i>n (%)</i> , unless otherwise specified |                                |                    |
| Age on procedure date              |                                           |                                |                    |
| Mean (SD)                          | 72.4 (8.1)                                | 73.2 (8.4)                     | 71.7 (8.1)         |
| Median (IQR)                       | 73 (67-78)                                | 74 (68-79)                     | 73 (66-78)         |
| Male sex                           | 1187 (78.6)                               | 1231 (76.9)                    | 453 (81.6)         |
| Ethnicity                          |                                           |                                |                    |
| Chinese                            | 6 (0.4)                                   | 7 (0.4)                        | *1-5 (0.2-0.9)     |
| South Asian                        | 22 (1.5)                                  | 23 (1.4)                       | *4-8 (0.7-1.4)     |
| Other                              | 1482 (98.1)                               | 1571 (98.1)                    | 546 (98.4)         |
| Prior stroke                       | 63 (4.2)                                  | 57 (3.6)                       | 27 (4.9)           |
| Prior transient ischemic attack    | 64 (4.2)                                  | 78 (4.9)                       | 25 (4.5)           |
| Prior carotid endarterectomy/stent | 27 (1.8)                                  | 33 (2.1)                       | 13 (2.3)           |
| Chronic lung disease               | 161 (10.7)                                | 180 (11.2)                     | 54 (9.7)           |
| Dialysis                           | 28 (1.9)                                  | 25 (1.6)                       | 9 (1.6)            |
| Liver disease                      | 23 (1.5)                                  | 26 (1.6)                       | 13 (2.3)           |
| Endocarditis                       |                                           |                                |                    |
| Current                            | *11-15 (0.07-1.0)                         | 8 (0.5)                        | *1-5 (0.2-0.9)     |
| Previous                           | *1-5 (0.0-0.3)                            | 6 (0.4)                        | *1-5 (0.2-0.9)     |
| Home oxygen in prior 1 year        | *1-5 (0.0-0.3)                            | *1-5 (0.06-0.3)                | *1-5 (0.2-0.9)     |
| Peripheral artery/vascular disease | 79 (5.2)                                  | 105 (6.6)                      | 31 (5.6)           |
| Hypertension                       | 1344 (89.0)                               | 1430 (89.3)                    | 444 (80.0)         |
| Diabetes                           | 553 (36.6)                                | 608 (38.0)                     | 197 (35.5)         |
| Body mass index, kg/m <sup>2</sup> |                                           |                                |                    |
| Mean (SD)                          | 30.0 (11.8)                               | 29.6 (7.1)                     | 31.1 (18.7)        |
| Median (IQR)                       | 29 (26-33)                                | 29 (26-33)                     | 29 (26-33)         |
| Missing                            | 63 (4.2%)                                 | 80 (5.0)                       | 15 (2.7)           |
| Body surface area, m <sup>2</sup>  |                                           |                                |                    |
| Mean (SD)                          | 2.01 (0.27)                               | 1.99 (0.24)                    | 2.02 (0.24)        |
| Median (IQR)                       | 2 (2-2)                                   | 2 (2-2)                        | 2 (2-2)            |
| Missing                            | 63 (4.2%)                                 | 80 (5.0)                       | 15 (2.7)           |
| Cancer/Time since diagnosis        |                                           |                                |                    |
| No cancer                          | 1243 (82.3)                               | 1314 (82.1)                    | 455 (82.0)         |
| <1 to 3 years                      | 68 (4.5)                                  | 80 (5.0)                       | 20 (3.6)           |
| ≥3 years                           | 199 (13.2)                                | 207 (12.9)                     | 80 (14.4)          |
| Smoking history                    |                                           |                                |                    |
| Current                            | 245 (16.2)                                | 234 (14.6)                     | 77 (13.9)          |
| Former                             | 594 (39.3)                                | 637 (39.8)                     | 217 (39.1)         |
| Never                              | 671 (44.4)                                | 730 (45.6)                     | 261 (47.0)         |
| Coma on admission                  | 0 (0)                                     | 0 (0)                          | 0 (0)              |
| Organ transplant                   | 8 (0.5)                                   | 14 (0.9)                       | *1-5 (0.2-0.9)     |
| Creatinine (µmol/L)                |                                           |                                |                    |
| 0-119                              | 1241 (82.2)                               | 1256 (78.5)                    | 450 (81.1)         |
| 120-179                            | 183 (12.1)                                | 193 (12.1)                     | 70 (12.6)          |
| 180+                               | 51 (3.4)                                  | 73 (4.6)                       | 21 (3.8)           |
| Missing                            | 35 (2.3)                                  | 79 (4.9)                       | 14 (2.5)           |

|                                                                        |               |               |                |
|------------------------------------------------------------------------|---------------|---------------|----------------|
| Hematocrit                                                             |               |               |                |
| Mean (SD)                                                              | 0.41 (0.05)   | 0.40 (0.05)   | 0.42 (0.04)    |
| Median (IQR)                                                           | 0 (0-0)       | 0 (0-0)       | 0 (0-0)        |
| Missing                                                                | 45 (3.0%)     | 18 (1.1)      | 21 (3.8)       |
| Platelets (x10 <sup>3</sup> /mm <sup>3</sup> )                         |               |               |                |
| Mean (SD)                                                              | 217.3 (71.6)  | 212.7 (68.8)  | 226.5 (68.3)   |
| Median (IQR)                                                           | 206 (172-251) | 205 (168-246) | 216 (186-258)  |
| Missing                                                                | 45 (3.0%)     | 18 (1.1)      | 21 (3.8)       |
| Leukocytes (x10 <sup>9</sup> /L)                                       |               |               |                |
| Mean (SD)                                                              | 7.6 (3.3)     | 7.6 (2.6)     | 7.3 (2.0)      |
| Median (IQR)                                                           | 7 (6-9)       | 7 (6-9)       | 7 (6-8)        |
| Missing                                                                | 45 (3.0%)     | 18 (1.1)      | 21 (3.8)       |
| Previous CABG                                                          | 31 (2.1)      | 31 (1.9)      | 10 (1.8)       |
| Previous transcatheter valve                                           | 0 (0)         | 0 (0.0)       | 0 (0.0)        |
| Previous open valve, or other open cardiac or thoracic aorta operation | 38 (2.5)      | 42 (2.6)      | 18 (3.2)       |
| Number of previous cardiovascular surgeries                            |               |               |                |
| None                                                                   | 1468 (97.2)   | 1566 (97.8)   | 536 (96.6)     |
| ≥1                                                                     | 42 (2.8)      | 35 (2.2)      | 19 (3.4)       |
| History and timing of PCI                                              |               |               |                |
| Within 1 day                                                           | 0 (0)         | 0 (0)         | 0 (0)          |
| >1 day prior                                                           | 219 (14.5)    | 186 (11.6)    | 73 (13.2)      |
| None                                                                   | 1291 (85.5)   | 1415 (88.4)   | 482 (86.8)     |
| Previous implantable cardioverter defibrillator                        | 9 (0.6)       | 8 (0.5)       | *1-5 (0.2-0.9) |
| Shock or pre-op ECMO, IABP or CBA                                      | 12 (0.8)      | 16 (1.0)      | 6 (1.1)        |
| Resuscitation within 1 day or on admission                             | 27 (1.8)      | 28 (1.7)      | 11 (2.0)       |
| Moribund                                                               | 53 (3.5)      | 56 (3.5)      | 28 (5.0)       |
| New York Heart Association (NYHA) class                                |               |               |                |
| 1                                                                      | 368 (24.4)    | 421 (26.3)    | 137 (24.7)     |
| 2                                                                      | 497 (32.9)    | 500 (31.2)    | 191 (34.4)     |
| 3                                                                      | 387 (25.6)    | 427 (26.7)    | 123 (22.2)     |
| 4                                                                      | 56 (3.7)      | 74 (4.6)      | 22 (4.0)       |
| No symptoms/missing/NA/unknown                                         | 202 (13.4)    | 179 (11.2)    | 82 (14.8)      |
| Status                                                                 |               |               |                |
| Urgent or waiting in hospital                                          | 503 (33.3)    | 572 (35.7)    | 205 (36.9)     |
| Waiting at home                                                        | 1007 (66.7)   | 1029 (64.3)   | 350 (63.1)     |
| Cardiac presentation on admission                                      |               |               |                |
| STEMI                                                                  | 14 (0.9)      | 20 (1.2)      | 7 (1.3)        |
| NSTEMI                                                                 | 153 (10.1)    | 155 (9.7)     | 53 (9.5)       |
| Unstable angina                                                        | 69 (4.6)      | 91 (5.7)      | 38 (6.8)       |
| Other                                                                  | 1274 (84.4)   | 1335 (83.4)   | 457 (82.3)     |
| Recent myocardial infarction                                           | 207 (13.7)    | 224 (14.0)    | 79 (14.2)      |
| Atrial fibrillation or flutter                                         |               |               |                |
| None                                                                   | 1242 (82.3)   | 1280 (80.0)   | 458 (82.5)     |
| Recent (within 30 days)                                                | 177 (11.7)    | 224 (14.0)    | 68 (12.3)      |
| Remote (>30 days)                                                      | 91 (6.0)      | 97 (6.1)      | 29 (5.2)       |
| Heart block or bradycardia                                             |               |               |                |
| None                                                                   | 1477 (97.8)   | 1554 (97.1)   | 542 (97.7)     |

Appendix 1, as supplied by the authors. Appendix to: Sun LY, Chu A, Tam DY, et al. Derivation and validation of predictive indices for 30-day mortality after coronary and valvular surgery in Ontario, Canada. *CMAJ* 2021. doi: 10.1503/cmaj.202901. Copyright © 2021 The Author(s) or their employer(s). To receive this resource in an accessible format, please contact us at [cmajgroup@cmaj.ca](mailto:cmajgroup@cmaj.ca).

|                                           |                  |                 |                 |
|-------------------------------------------|------------------|-----------------|-----------------|
| Recent (within 30 days)                   | 14 (0.9)         | 16 (1.0)        | *1-5 (0.2-0.9)  |
| Remote (>30 days)                         | 19 (1.3)         | 31 (1.9)        | *8-12 (1.4-2.2) |
| Ventricular tachycardia or fibrillation   |                  |                 |                 |
| None                                      | 1493 (98.9)      | 1579 (98.6)     | *550-554        |
| Recent (within 30 days)                   | *1-5 (0.0-0.3)   | 6 (0.4)         | *1-5 (0.2-0.9)  |
| Remote (>30 days)                         | *12-16 (0.8-1.1) | 16 (1.0)        | *1-5 (0.2-0.9)  |
| History of mediastinal radiation          | 0 (0)            | *1-5 (0.06-0.3) | 0 (0)           |
| Left ventricular ejection fraction (LVEF) |                  |                 |                 |
| ≥50%                                      | 1175 (77.8)      | 1215 (75.9)     | 419 (75.5)      |
| 35-49%                                    | 193 (12.8)       | 99 (6.2)        | 34 (6.1)        |
| 20-34%                                    | 90 (6.0)         | 13 (0.8)        | 6 (1.1)         |
| <20%                                      | 10 (0.7)         | 39 (2.4)        | 14 (2.5)        |
| Missing                                   | 42 (2.8)         | 39 (2.4)        | 14 (2.5)        |
| Left main disease                         | 241 (16)         | 258 (16.1)      | 110 (19.8)      |
| Proximal LAD stenosis                     | 416 (27.5)       | 441 (27.5)      | 199 (35.9)      |
| Number of diseased coronary vessels       |                  |                 |                 |
| Unknown                                   | 191 (12.6)       | 206 (12.9)      | 63 (11.4)       |
| 1                                         | 191 (12.6)       | 464 (29.0)      | 144 (25.9)      |
| 2                                         | 445 (29.5)       | 519 (32.4)      | 162 (29.2)      |
| 3                                         | 462 (30.6)       | 412 (25.7)      | 186 (33.5)      |
| Mitral regurgitation                      | 16 (1.1)         | 22 (1.4)        | *1-5 (0.2-0.9)  |
| Aortic stenosis or regurgitation          | 1330 (88.1)      | 1448 (90.4)     | 469 (84.5)      |
| Severe tricuspid insufficiency            | *1-5 (0.0-0.3)   | 0 (0.0)         | 0 (0.0)         |
| Thoracic aorta disease                    | 7 (0.5)          | *1-5 (0.06-0.3) | *1-5 (0.2-0.9)  |
| ICU or CCU admission within 48 hours      | 33 (2.2)         | 34 (2.1)        | 8 (1.4)         |
| Hospital Frailty Risk Score               |                  |                 |                 |
| Mean (SD)                                 | 3.4 (4.3)        | 3.9 (4.7)       | 3.5 (4.3)       |
| Median (IQR)                              | 2 (0-5)          | 2 (0-6)         | 2 (0-5)         |

CABG indicates coronary artery bypass graft; CBA, catheter-based assist device; CCU, critical care unit; ECMO, extracorporeal membrane oxygenation; IABP, intra-aortic balloon pump; ICU, intensive care unit; IQR, interquartile range; LAD, left anterior descending artery; NSTEMI, non-ST-elevation myocardial infarction; PCI, percutaneous coronary intervention; SD, standard deviation; STEMI, ST-elevation myocardial infarction.

\* Data suppressed due to small counts.

**Supplemental Figure 1. Calibration plots for observed versus expected 30-day mortality rates by decile of expected rate and surgery type**

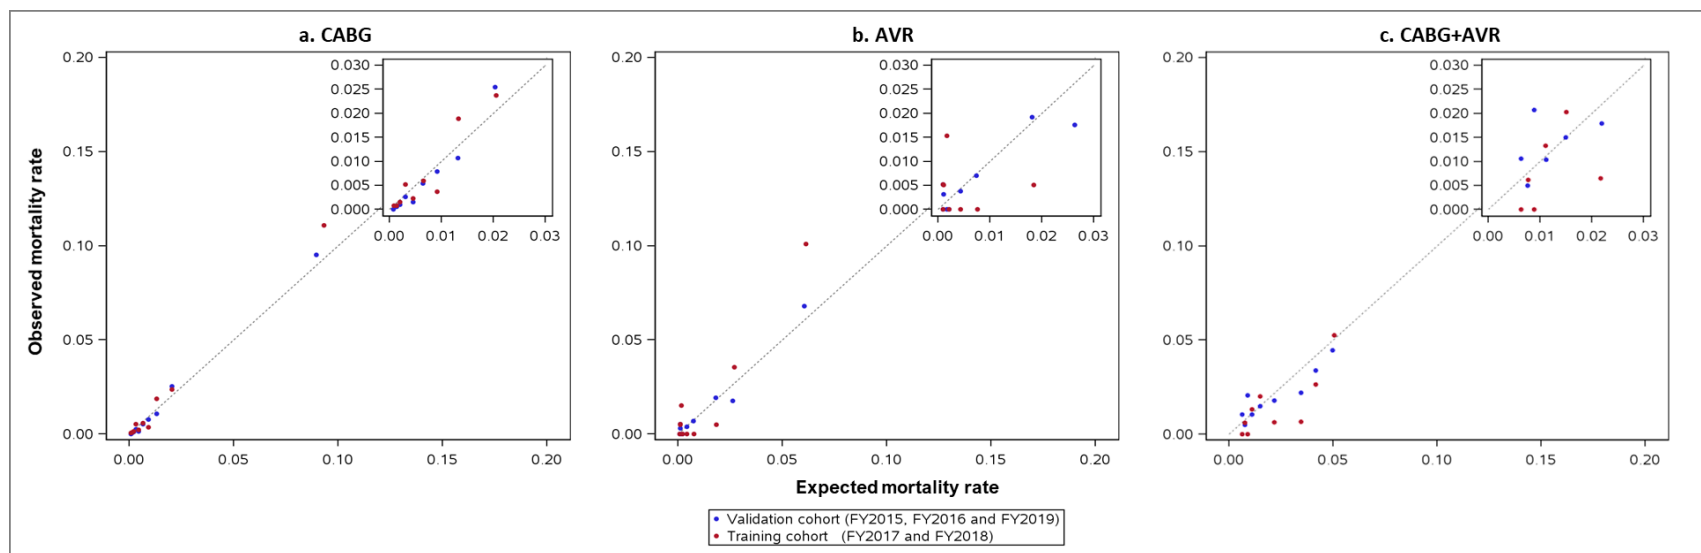

AVR indicates aortic valve replacement; CABG, coronary artery bypass graft; FY, fiscal year.



## References

1. Shah B, Chiu M, Amin S, Ramani M, Sadry S, Tu JV. Surname lists to identify South Asian and Chinese ethnicity from secondary data in Ontario, Canada: a validation study. *BMC Med Res Methodol.* 2010;10(1):42.
2. Kokotailo RA, Hill MD. Coding of stroke and stroke risk factors using International Classification of Diseases, Revisions 9 and 10. *Stroke.* 2005;36(8):1776-1781.
3. Hussain MA, Mamdani M, Saposnik G, et al. Validation of carotid artery revascularization coding in Ontario health administrative databases. *Clin Invest Med.* 2016;39(2):E73-78.
4. Quan H, Parsons GA, Ghali WA. Validity of information on comorbidity derived from ICD-9-CCM administrative data. *Med Care.* 2002;40(8):675-685.
5. Hussain MA, Al-Omran M, Salata K, et al. Population-based secular trends in lower-extremity amputation for diabetes and peripheral artery disease. *CMAJ.* 2019;191(35):E955-e961.
6. O'Brien SM, Feng L, He X, et al. The Society of Thoracic Surgeons 2018 Adult Cardiac Surgery Risk Models: Part 2-Statistical Methods and Results. *Ann Thorac Surg.* 2018;105(5):1419-1428.
7. Tu JV, Chu A, Donovan LR, et al. The Cardiovascular Health in Ambulatory Care Research Team (CANHEART): Using big data to measure and improve cardiovascular health and health care services. *Circ Cardiovasc Qual Outcomes.* 2015;8:204-212.
8. Tu K, Campbell NR, Chen ZL, Cauch-Dudek KJ, McAlister FA. Accuracy of administrative databases in identifying patients with hypertension. *Open Med.* 2007;1(1):e18-e26.
9. Clarke EA, Marrett LD, Kreiger N. Cancer registration in Ontario: a computer approach. *IARC Scientific Publications.* 1991;95:246-257.
10. Canadian Institute for Health Information. Data Quality Documentation for Users: Canadian Organ Replacement Register, 2010 to 2019 Data. Ottawa, ON: CIHI; 2020.
11. Lee DS, Stitt A, Wang X, et al. Administrative hospitalization database validation of cardiac procedure codes. *Med Care.* 2013;51(4):e22-e26.
12. Donio PJ, Freitas C, Austin PC, et al. Comparison of readmission and death among patients with cardiac disease in northern vs southern Ontario. *Can J Cardiol.* 2019;35(3):341-351.
13. Qirjazi E, McArthur E, Nash DM, et al. Risk of ventricular arrhythmia with Citalopram and Escitalopram: a population-based study. *PLOS ONE.* 2016;11(8):e0160768.
14. Scales DC, Guan J, Martin CM, Redelmeier DA. Administrative data accurately identified intensive care unit admissions in Ontario. *J Clin Epidemiol.* 2006;59(8):802-807.
15. Gilbert T, Neuburger J, Kraindler J, et al. Development and validation of a Hospital Frailty Risk Score focusing on older people in acute care settings using electronic hospital records: an observational study. *The Lancet.* 2018;391(10132):1775-1782.
